# Supplementary material for: Comparison of Characteristics of Neuropathic and Non-neuropathic Pruritus to Develop a Tool for the Diagnosis of Neuropathic Pruritus: The NP5
Source: Front Med (Lausanne). 2019 Apr 17;6:79. doi: 10.3389/fmed.2019.00079 (PMC6499201; doi:10.3389/fmed.2019.00079)
Supplement: Supplementary file 1 [file Table_1.docx]

|  | **Neuropathic pruritus**  **n=53** | **Non-neuropathic pruritus**  **n=54** | **p value** |
| --- | --- | --- | --- |
| ***Sex*** *n (%)*  *Male  Female* | 22 (42)  31 (58) | 33 (61)  21(39) | 0.042 |
| **Age** *(years)*  *Mean +/- SD* | 66.5 +/- 12.8 | 61.9 +/- 18.8 | 0.143 |
| **Etiologies**  n (%) | | SFN | 45(85) | | --- | --- | | Brachioradial pruritus | 3(6) | | Post-radiation therapy | 1(2) | | Notalgia paresthetica | 2(4) | | Axonal polyneuropathy | 1(2) | | Posterior cervical myelopathy | 1(2) | | | Psoriasis | 13(24) | | --- | --- | | Eczema | 13(24) | | Atopic dermatitis | 1(2) | | Psychogenic pruritus | 11 (20) | | Urticaria | 2(4) | | Scabies | 1(2) | | Bullous pemphigoid | 5(9) | | Mycosis fungoid | 3(6) | | Sezary syndrome | 4(7) | | Pityriasis rubra pilaris | 1(2) | |  |

Supplementary table 1. Demographic characteristics and etiologies of pruritus in the two groups: neuropathic and non-neuropathic pruritus.
